# Supplementary material
Source: publisher site journal article supplement (https://static.cambridge.org/content/id/urn:cambridge.org:id:article:S1041610220000915/resource/name/S1041610220000915supp001.docx)
Supplement: Supplementary file 1 [file S1041610220000915supp001.docx]

***End-of-life Care in Schizophrenia: A Systematic Review***

**SUPPLEMENTRY MATERIAL: APPENDIX A**

**Data Sources and Search Strategies**

Ovid

Database(s): Embase 1988 to 2018 Week 34, PsycINFO 1806 to August Week 2 2018, EBM Reviews - Cochrane Central Register of Controlled Trials July 2018, EBM Reviews - Cochrane Database of Systematic Reviews 2005 to August 15, 2018, Ovid MEDLINE(R) and Epub Ahead of Print, In-Process & Other Non-Indexed Citations and Daily 1946 to August 20, 2018

Search Strategy:

# Searches Results

1 exp Schizophrenia/ 335975

2 ("delusional disorder*" or "dementia praecox" or "dementia precox" or "folie a deux" or "folie a trois" or hebephrenia* or "positive syndrome" or schizophrenia* or schizophrenic* or "Schizophreniform Disorder*" or "Shared Paranoid Disorder*" or "shared psychotic disorder*").ti,ab,hw,kw. 438246

3 1 or 2 439035

4 exp palliative therapy/ 142297

5 exp Palliative Care/ 153154

6 exp Hospices/ 14924

7 (((death or dying or "end-of-life") adj3 (treatment* or therap* or care or healthcare or surg* or manag* or intervention* or radiotherap*)) or hospice* or palliation or palliative).ti,ab,hw,kw. 305999

8 or/4-7 305999

9 3 and 8 486

10 limit 9 to english language [Limit not valid in CDSR; records were retained] 439

11 limit 10 to yr="2008 -Current" 319

12 (exp animals/ or exp nonhuman/) not exp humans/ 9173637

13 ((alpaca or alpacas or amphibian or amphibians or animal or animals or antelope or armadillo or armadillos or avian or baboon or baboons or beagle or beagles or bee or bees or bird or birds or bison or bovine or buffalo or buffaloes or buffalos or "c elegans" or "Caenorhabditis elegans" or camel or camels or canine or canines or carp or cats or cattle or chick or chicken or chickens or chicks or chimp or chimpanze or chimpanzees or chimps or cow or cows or "D melanogaster" or "dairy calf" or "dairy calves" or deer or dog or dogs or donkey or donkeys or drosophila or "Drosophila melanogaster" or duck or duckling or ducklings or ducks or equid or equids or equine or equines or feline or felines or ferret or ferrets or finch or finches or fish or flatworm or flatworms or fox or foxes or frog or frogs or "fruit flies" or "fruit fly" or "G mellonella" or "Galleria mellonella" or geese or gerbil or gerbils or goat or goats or goose or gorilla or gorillas or hamster or hamsters or hare or hares or heifer or heifers or horse or horses or insect or insects or jellyfish or kangaroo or kangaroos or kitten or kittens or lagomorph or lagomorphs or lamb or lambs or llama or llamas or macaque or macaques or macaw or macaws or marmoset or marmosets or mice or minipig or minipigs or mink or minks or monkey or monkeys or mouse or mule or mules or nematode or nematodes or octopus or octopuses or orangutan or "orang-utan" or orangutans or "orang-utans" or oxen or parrot or parrots or pig or pigeon or pigeons or piglet or piglets or pigs or porcine or primate or primates or quail or rabbit or rabbits or rat or rats or reptile or reptiles or rodent or rodents or ruminant or ruminants or salmon or sheep or shrimp or slug or slugs or swine or tamarin or tamarins or toad or toads or trout or urchin or urchins or vole or voles or waxworm or waxworms or worm or worms or xenopus or "zebra fish" or zebrafish) not (human or humans or patient or patients)).ti,ab,hw,kw. 8209090

14 11 not (12 or 13) 310

15 limit 14 to (abstract collection or bibliography or chapter or "column/opinion" or "comment/reply" or dissertation or editorial or encyclopedia entry or "erratum/correction" or interview or letter or obituary or poetry or publication information or reprint or retraction or review-book or review-media or review-software & other) [Limit not valid in Embase,CCTR,CDSR,Ovid MEDLINE(R),Ovid MEDLINE(R) Daily Update,Ovid MEDLINE(R) In-Process,Ovid MEDLINE(R) Publisher; records were retained] 29

16 limit 14 to (abstract or addresses or bibliography or biography or comment or duplicate publication or editorial or interview or lectures or letter or news or overall or published erratum) [Limit not valid in Embase,PsycINFO,CDSR,Ovid MEDLINE(R),Ovid MEDLINE(R) Daily Update,Ovid MEDLINE(R) In-Process,Ovid MEDLINE(R) Publisher; records were retained] 22

17 limit 14 to (books or chapter or conference abstract or "conference review" or editorial or erratum or letter or note or "0200 book" or "0240 authored book" or "0280 edited book" or "0300 encyclopedia" or "0400 dissertation abstract" or addresses or autobiography or bibliography or biography or dataset or dictionary or directory or duplicate publication or "expression of concern" or festschrift or interactive tutorial or interview or lectures or legal cases or legislation or news or newspaper article or overall or patient education handout or periodical index or personal narratives or portraits or published erratum or video-audio media or webcasts) [Limit not valid in Embase,PsycINFO,CCTR,CDSR,Ovid MEDLINE(R),Ovid MEDLINE(R) Daily Update,Ovid MEDLINE(R) In-Process,Ovid MEDLINE(R) Publisher; records were retained] 120

18 from 14 keep 259 1

19 (14 not (15 or 16 or 17)) or 18 189

20 remove duplicates from 19 128

Scopus

1 TITLE-ABS-KEY("delusional disorder*" or "dementia praecox" or "dementia precox" or "folie a deux" or "folie a trois" or hebephrenia* or "positive syndrome" or schizophrenia* or schizophrenic* or "Schizophreniform Disorder*" or "Shared Paranoid Disorder*" or "shared psychotic disorder*")

2 TITLE-ABS-KEY(((death or dying or "end-of-life") W/3 (treatment* or therap* or care or healthcare or surg* or manag* or intervention* or radiotherap*)) OR hospice* OR palliation OR palliative)

3 PUBYEAR AFT 2007 AND LANGUAGE(english)

4 1 and 2 and 3

5 TITLE-ABS-KEY((alpaca OR alpacas OR amphibian OR amphibians OR animal OR animals OR antelope OR armadillo OR armadillos OR avian OR baboon OR baboons OR beagle OR beagles OR bee OR bees OR bird OR birds OR bison OR bovine OR buffalo OR buffaloes OR buffalos OR "c elegans" OR "Caenorhabditis elegans" OR camel OR camels OR canine OR canines OR carp OR cats OR cattle OR chick OR chicken OR chickens OR chicks OR chimp OR chimpanze OR chimpanzees OR chimps OR cow OR cows OR "D melanogaster" OR "dairy calf" OR "dairy calves" OR deer OR dog OR dogs OR donkey OR donkeys OR drosophila OR "Drosophila melanogaster" OR duck OR duckling OR ducklings OR ducks OR equid OR equids OR equine OR equines OR feline OR felines OR ferret OR ferrets OR finch OR finches OR fish OR flatworm OR flatworms OR fox OR foxes OR frog OR frogs OR "fruit flies" OR "fruit fly" OR "G mellonella" OR "Galleria mellonella" OR geese OR gerbil OR gerbils OR goat OR goats OR goose OR gorilla OR gorillas OR hamster OR hamsters OR hare OR hares OR heifer OR heifers OR horse OR horses OR insect OR insects OR jellyfish OR kangaroo OR kangaroos OR kitten OR kittens OR lagomorph OR lagomorphs OR lamb OR lambs OR llama OR llamas OR macaque OR macaques OR macaw OR macaws OR marmoset OR marmosets OR mice OR minipig OR minipigs OR mink OR minks OR monkey OR monkeys OR mouse OR mule OR mules OR nematode OR nematodes OR octopus OR octopuses OR orangutan OR "orang-utan" OR orangutans OR "orang-utans" OR oxen OR parrot OR parrots OR pig OR pigeon OR pigeons OR piglet OR piglets OR pigs OR porcine OR primate OR primates OR quail OR rabbit OR rabbits OR rat OR rats OR reptile OR reptiles OR rodent OR rodents OR ruminant OR ruminants OR salmon OR sheep OR shrimp OR slug OR slugs OR swine OR tamarin OR tamarins OR toad OR toads OR trout OR urchin OR urchins OR vole OR voles OR waxworm OR waxworms OR worm OR worms OR xenopus OR "zebra fish" OR zebrafish) AND NOT (human OR humans or patient or patients))

6 4 and not 5

7 DOCTYPE(le) OR DOCTYPE(ab) OR DOCTYPE(ed) OR DOCTYPE(bk) OR DOCTYPE(er) OR DOCTYPE(no) OR DOCTYPE(sh)

8 6 and not 7

9 INDEX(embase) OR INDEX(medline) OR PMID(0* OR 1* OR 2* OR 3* OR 4* OR 5* OR 6* OR 7* OR 8* OR 9*)

10 8 and not 9
